# Supplementary material for: Synthesis of 3D hierarchical porous Ni–Co layered double hydroxide/N-doped reduced graphene oxide composites for supercapacitor electrodes
Source: Royal Society of Chemistry journal article supplement (doi:10.1039/c8qi01132j), 2018-12-05
Supplement: c8qi01132j1.pdf [file c8qi01132j1.pdf]

## Supporting Information

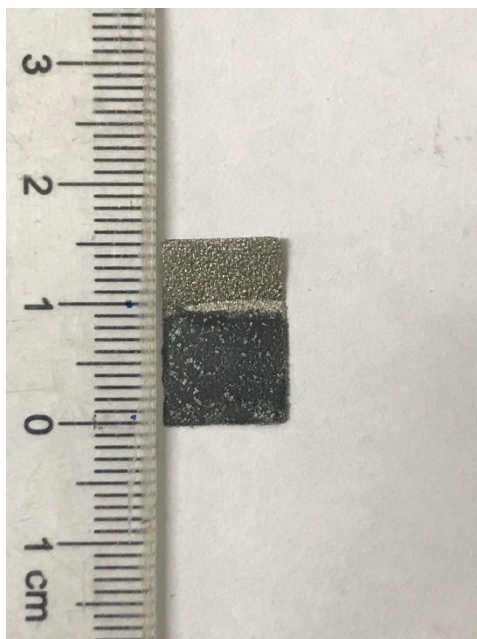

**Fig. S1.** Image of the prepared working electrode.

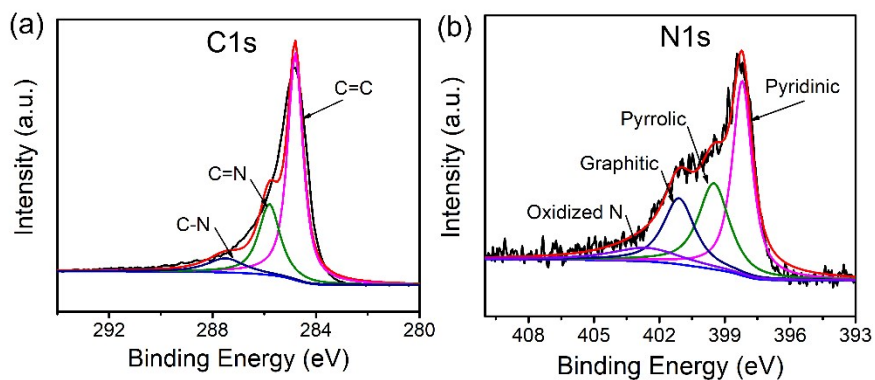

**Fig. S2.** (a) High-resolution C1s spectra and (b) N1s spectra of the NG-1.

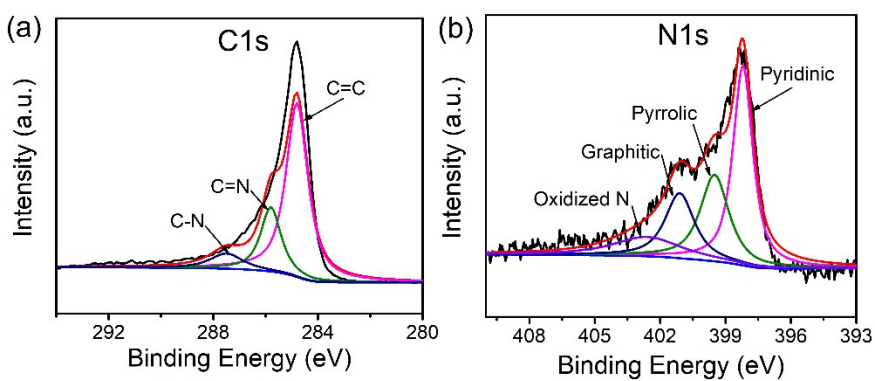

**Fig. S3.** (a) High-resolution C1s spectra and (b) N1s spectra of the NG-10.

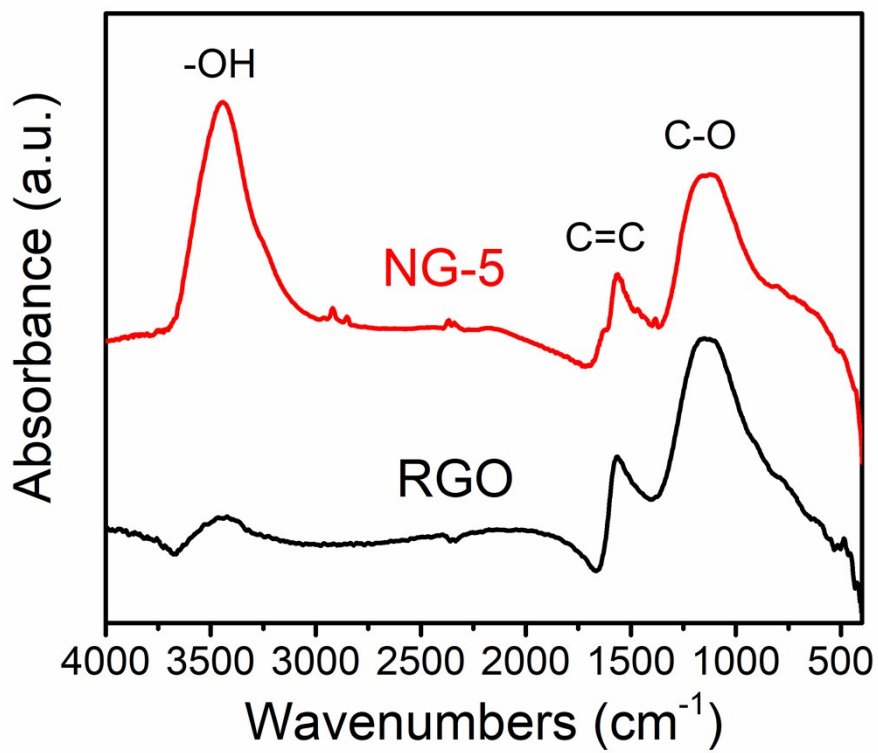

**Fig. S4.** FT-IR spectra of RGO and NG-5.

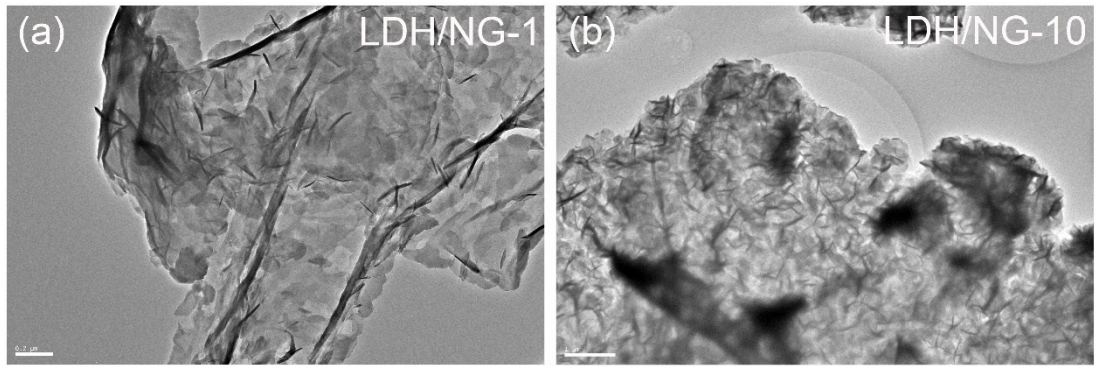

**Fig. S5.** TEM images of (a) LDH/NG-1 and (b) LDH/NG-10.

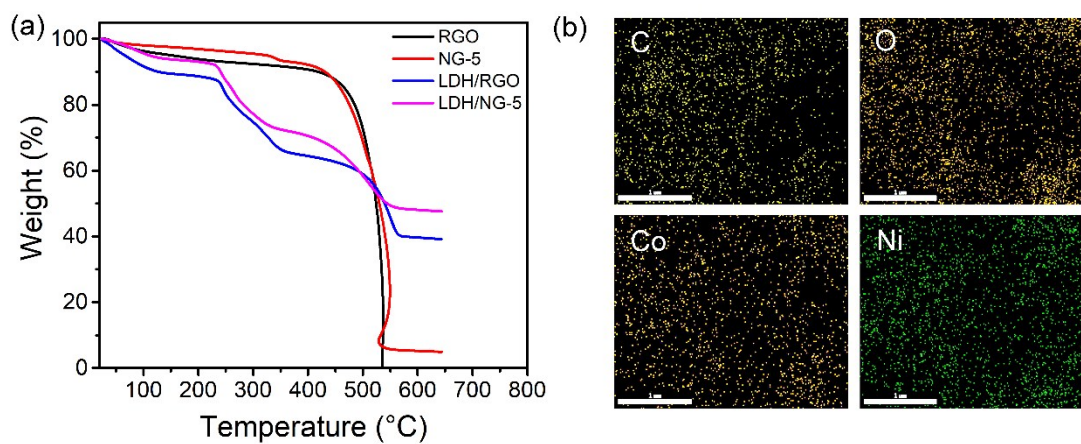

**Fig. S6.** (a) TG curves of RGO, NG-5, LDH/RGO, and LDH/NG-5. (b) EDS images of C, O, Co, Ni elements distributions of LDH/NG-5.

**Table S1**

Percentages of C, O, Co, Ni elements in the LDH/NG-1, LDH/NG-5, and LDH/NG-10.

|        | LDH/NG-1 | LDH/NG-5 | LDH/NG-10 |
|--------|----------|----------|-----------|
| C (%)  | 25       | 23       | 22        |
| O (%)  | 28       | 28       | 32        |
| Co (%) | 18       | 18       | 19        |
| Ni (%) | 29       | 31       | 27        |

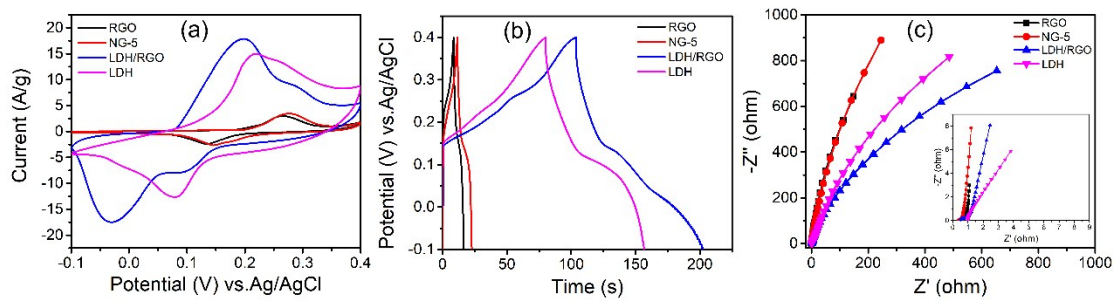

**Fig. S7.** (a) Cyclic voltammety curves of different electrodes at  $5 \text{ mV s}^{-1}$ , (b) charge-discharge curves of different electrodes at current density of  $6.25 \text{ A g}^{-1}$ , and (c) Nyquist plots of different electrodes, where the inset shows the impedance in the high-frequency region.

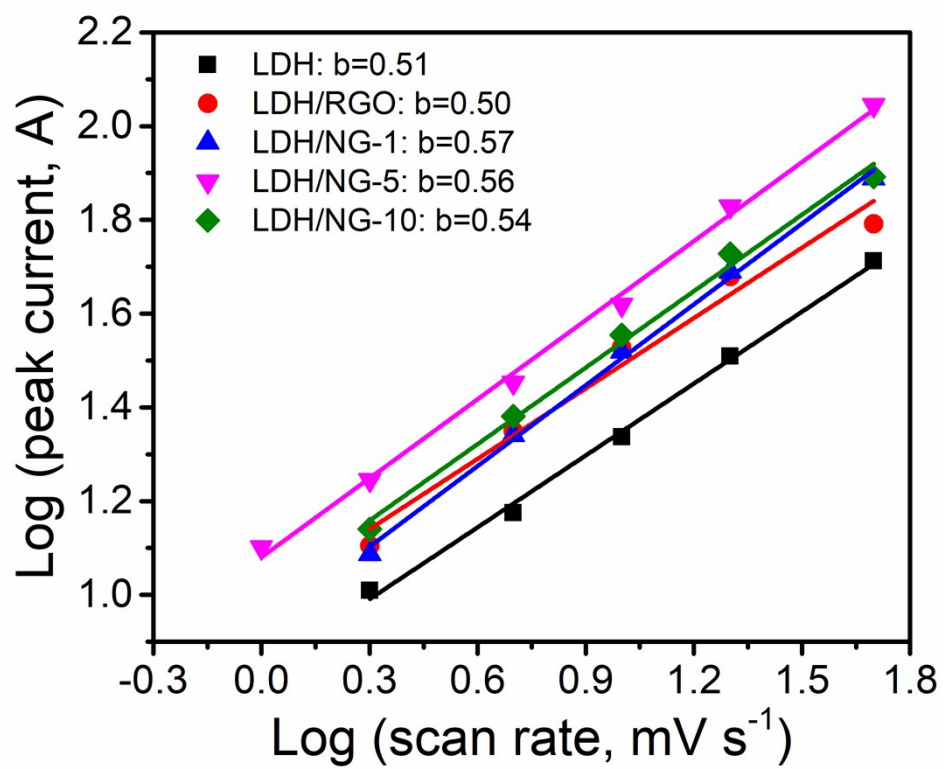

Fig. S8. Logarithm relationship between anodic peak current and scan rate

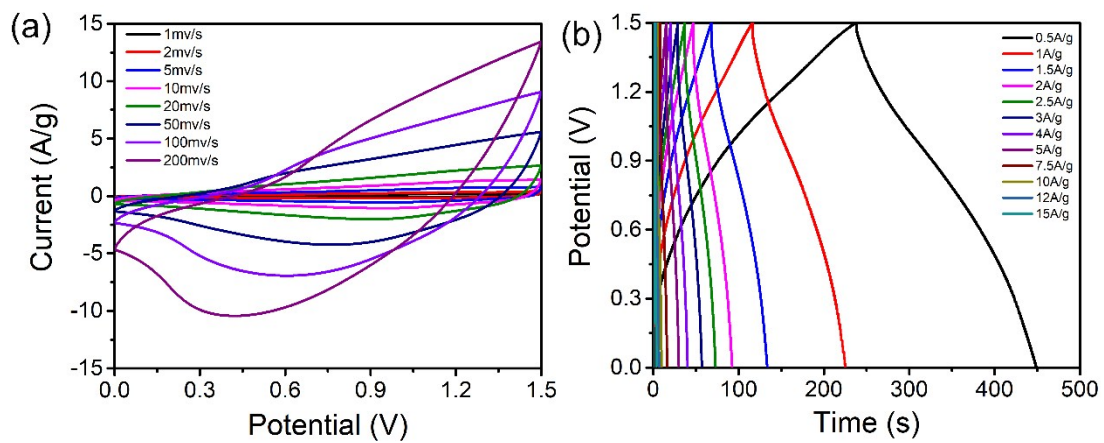

**Fig. S9.** CV and GCD curves of LDH//AC capacitor



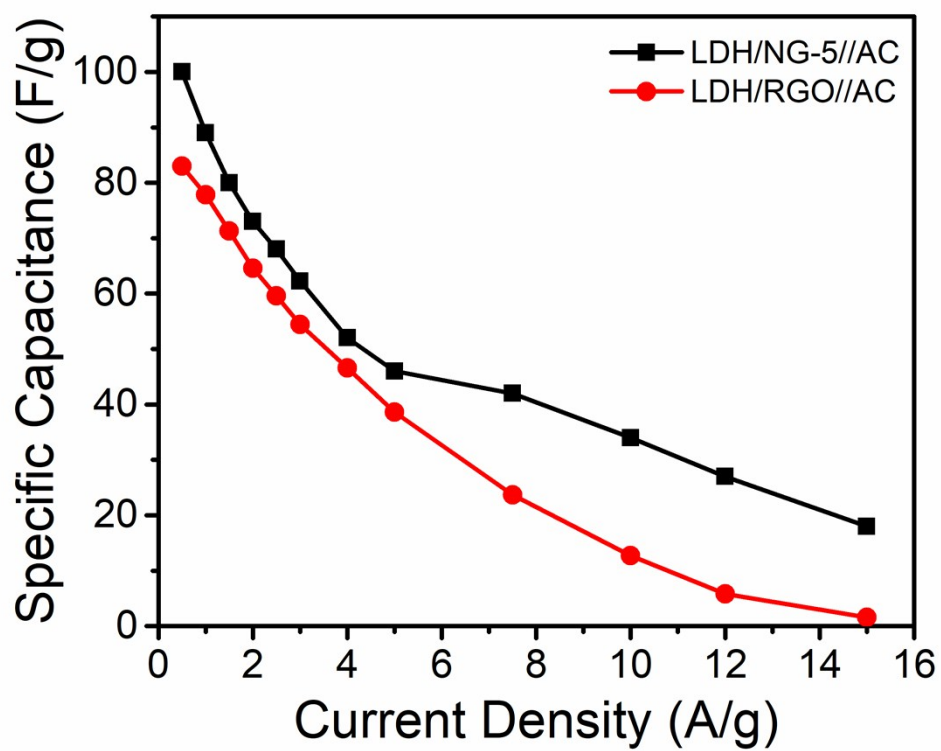

**Fig. S10.** Rate capabilities of LDH/NG-5//AC and LDH/RGO//AC
